# Supplementary material
Source: HighWire-hosted journal article supplement (https://svn.smart01.highwire.org/content/9/6/693)

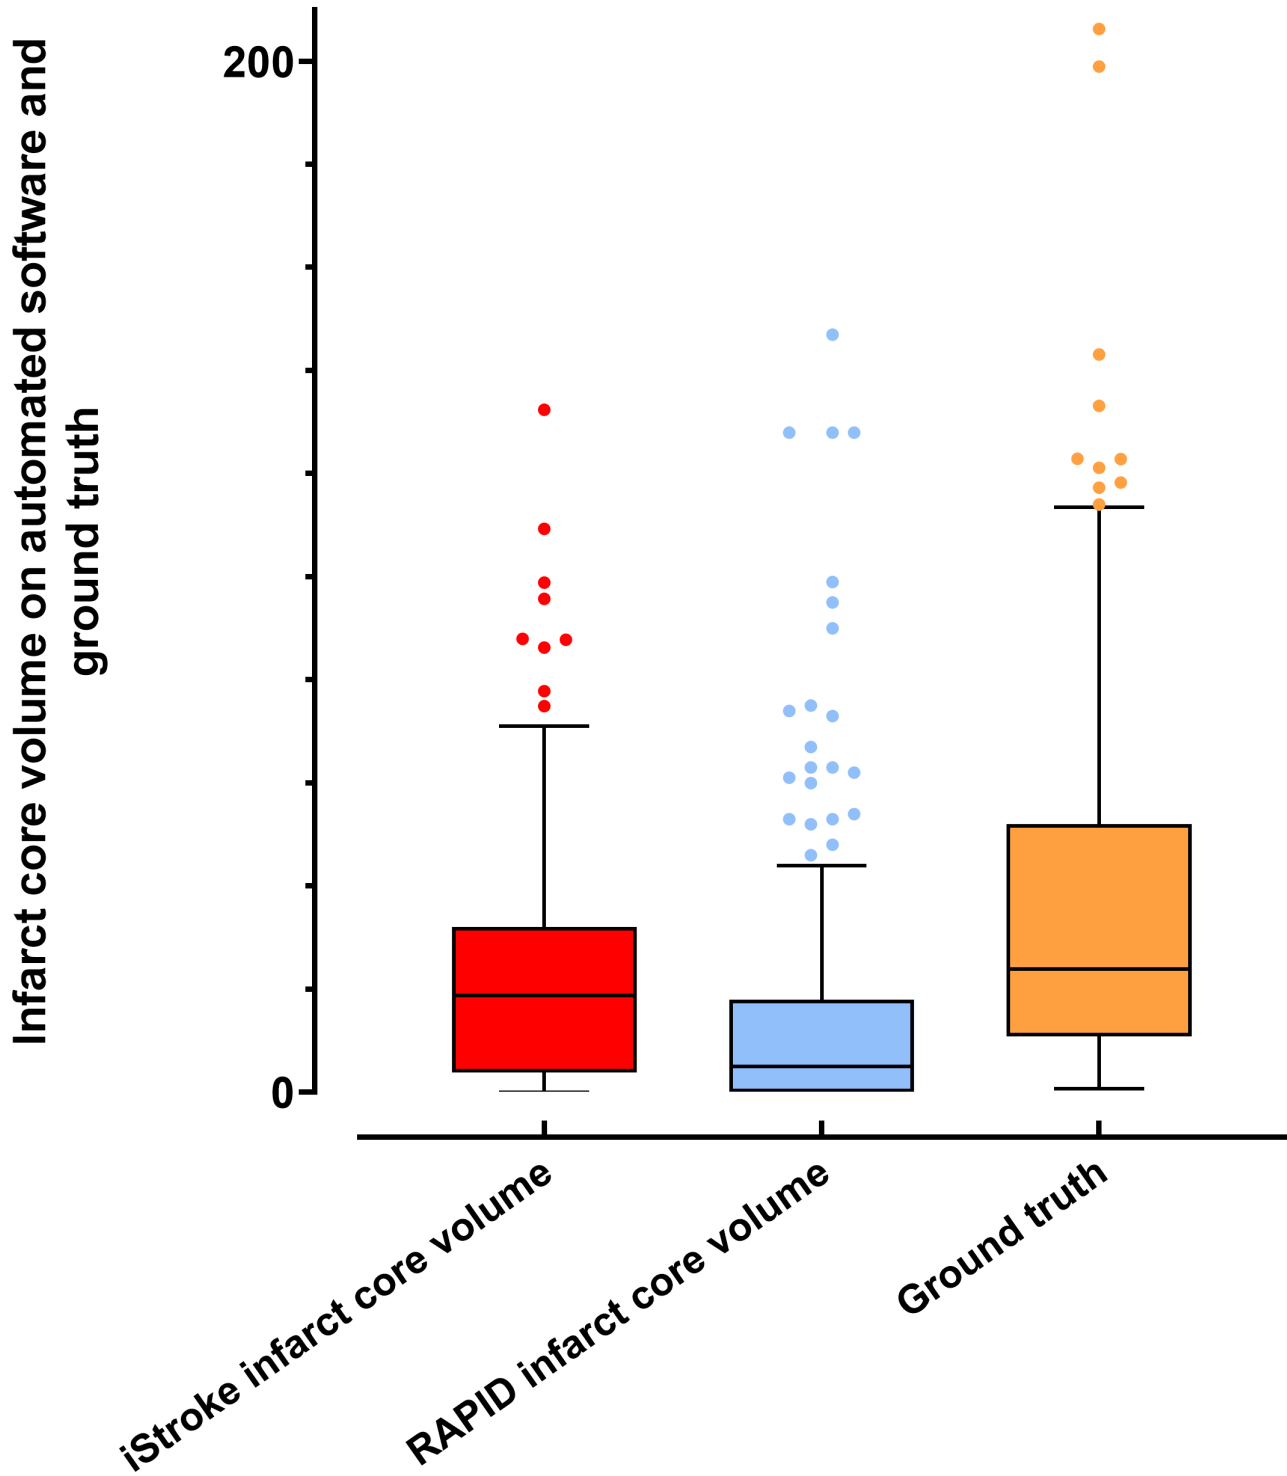

Supplement: inline-supplementary-material-3 [file inline-supplementary-material-3.pdf]
